# Supplementary material
Source: PubMed Central journal article supplement (PMC3486535)

A.

AAC:asn (wt)  
AGC:ser (NSS)

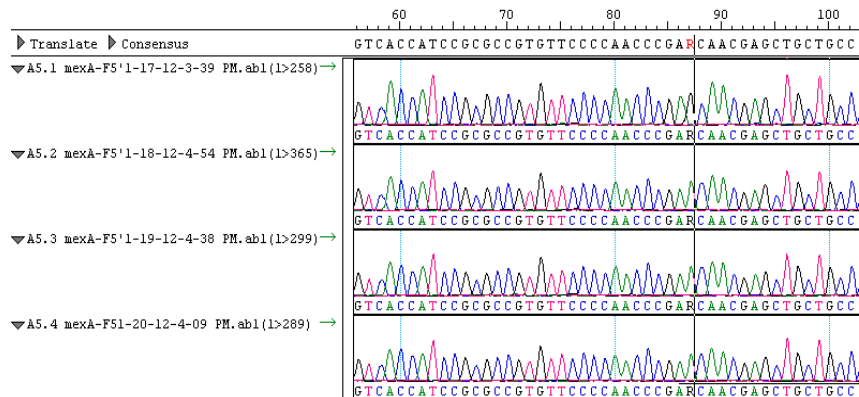

B.

GAG:glu (wt)  
AAG:lys (NSS) CCA:pro (wt)  
CCG:pro (SS)

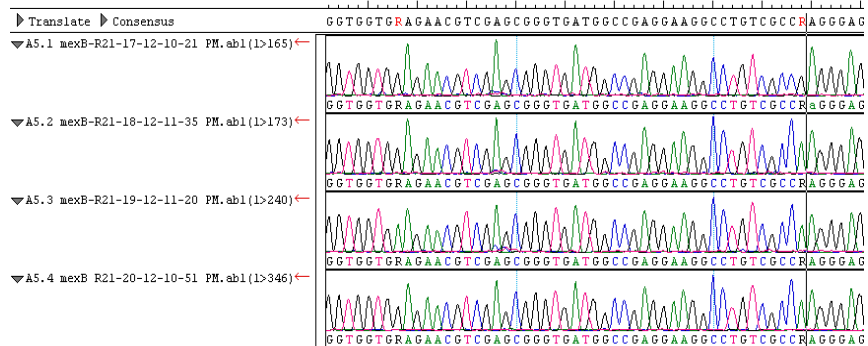

C.

GCT: ala (wt)  
GCC: ala (SS)

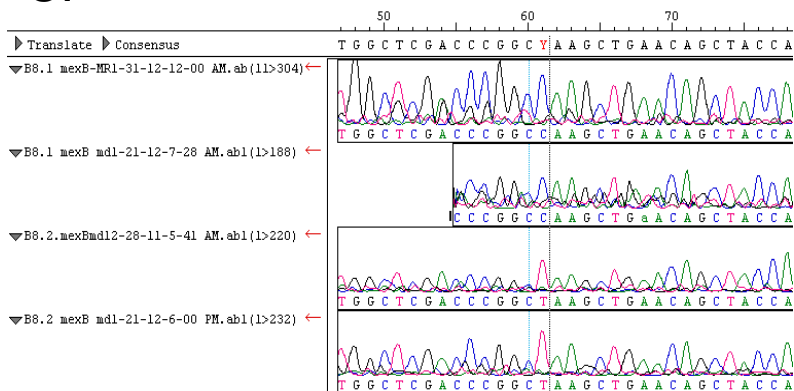

D.

CCC: pro (wt)  
CTC: leu (NSS)

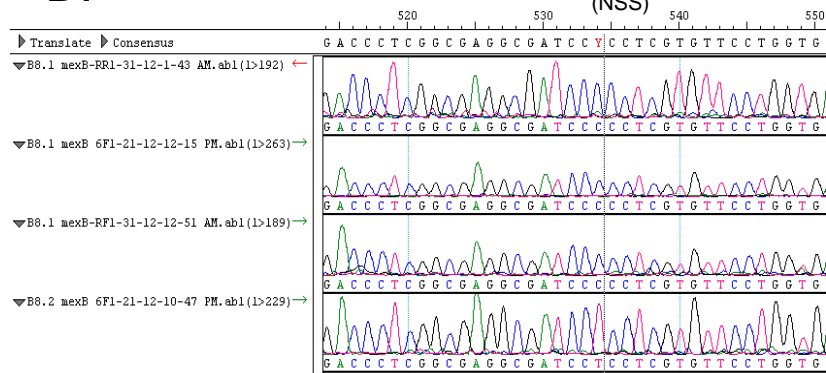

Supplement: AAC.01371-12_zac999101385so1.pdf [file AAC.01371-12_zac999101385so1.pdf]
